# Supplementary material for: N-doping induced lattice-strained porous PdIr bimetallene for pH-universal hydrogen evolution electrocatalysis
Source: Royal Society of Chemistry journal article supplement (doi:10.1039/d2ta00590e), 2022-01-01
Supplement: d2ta00590e1.pdf [file d2ta00590e1.pdf]

## Supporting Information for

### **N-doping induced lattice-strained porous PdIr bimetallic for pH-universal hydrogen evolution electrocatalysis**

Qiqi Mao, Kai Deng, Wenxin Wang, Peng Wang, You Xu, Ziqiang Wang, Xiaonian Li, Liang Wang and Hongjing Wang\*

State Key Laboratory Breeding Base of Green-Chemical Synthesis Technology, College of Chemical Engineering, Zhejiang University of Technology, Hangzhou 310014, P. R. China.

#### **Corresponding author**

\*E-mail: [hjw@zjut.edu.cn](mailto:hjw@zjut.edu.cn) (H.J.W.).

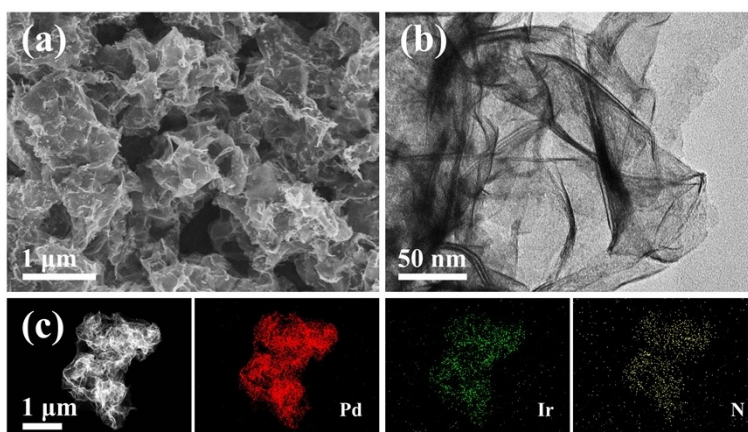

**Fig. S1** (a) SEM and (b)TEM images of the PdIr bimetallic. (c) HAADF-STEM image and associated element mapping images.

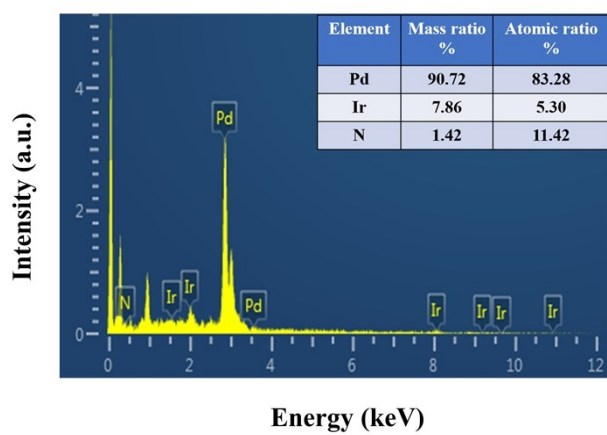

**Fig. S2** EDX spectrum of the PdIr bimetallic.

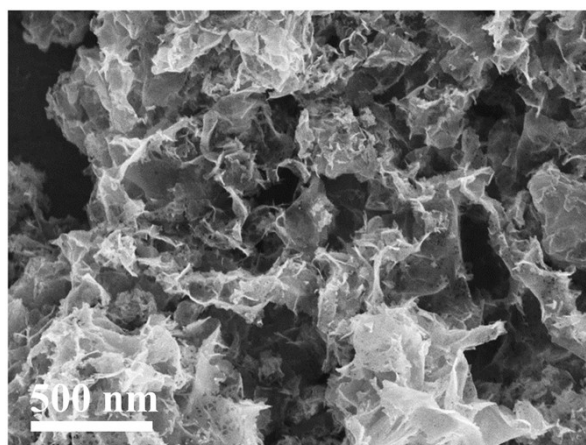

**Fig. S3** Large-scale SEM image of the N-PdIr bimetallic.

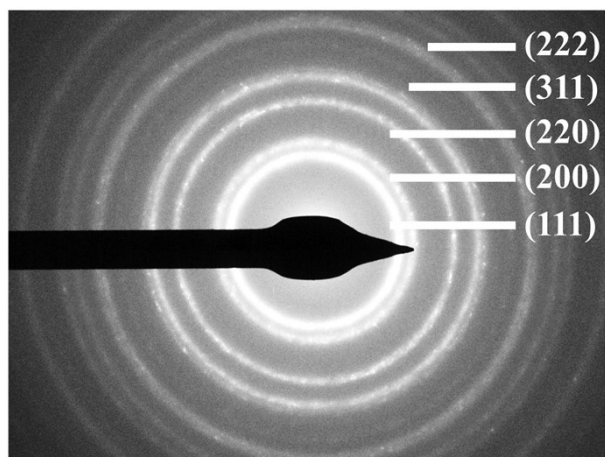

**Fig. S4** The SAED pattern of the N-PdIr bimetallic.

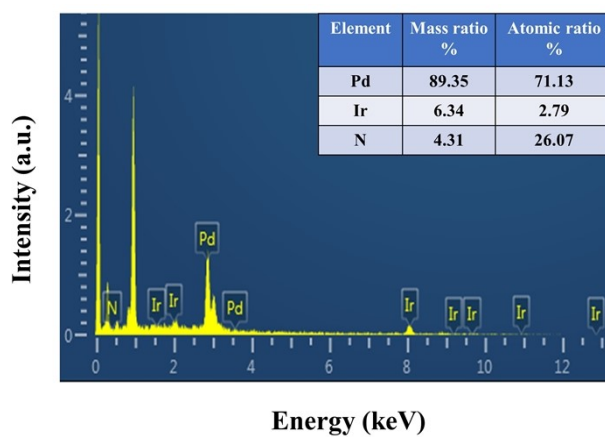

**Fig. S5** EDX spectrum of the N-PdIr bimetallic.

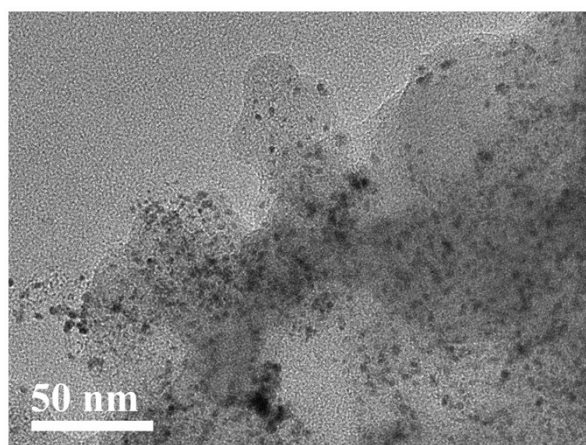

**Fig. S6** The TEM image of the Pt/C.

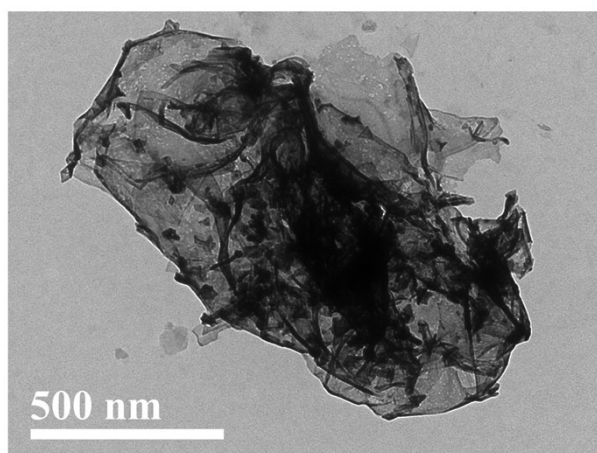

**Fig. S7** The TEM image of the N-Pd metallene.

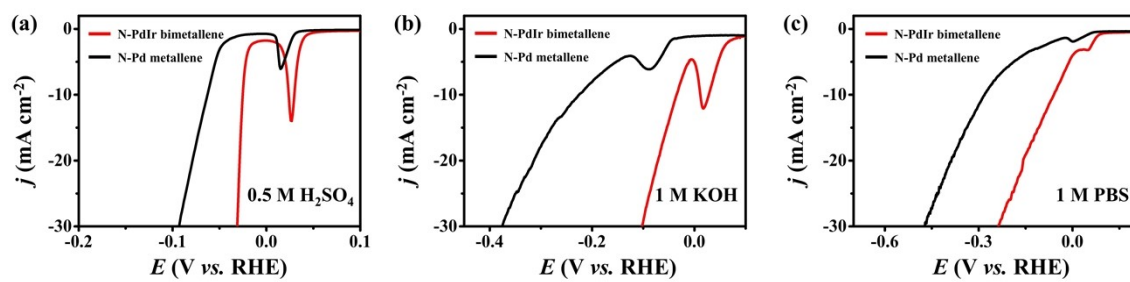

**Fig. S8** (a, b, and c) HER polarization curves of the N-PdIr bimetalene and N-Pd metallene in acidic, alkaline, and neutral electrolytes.

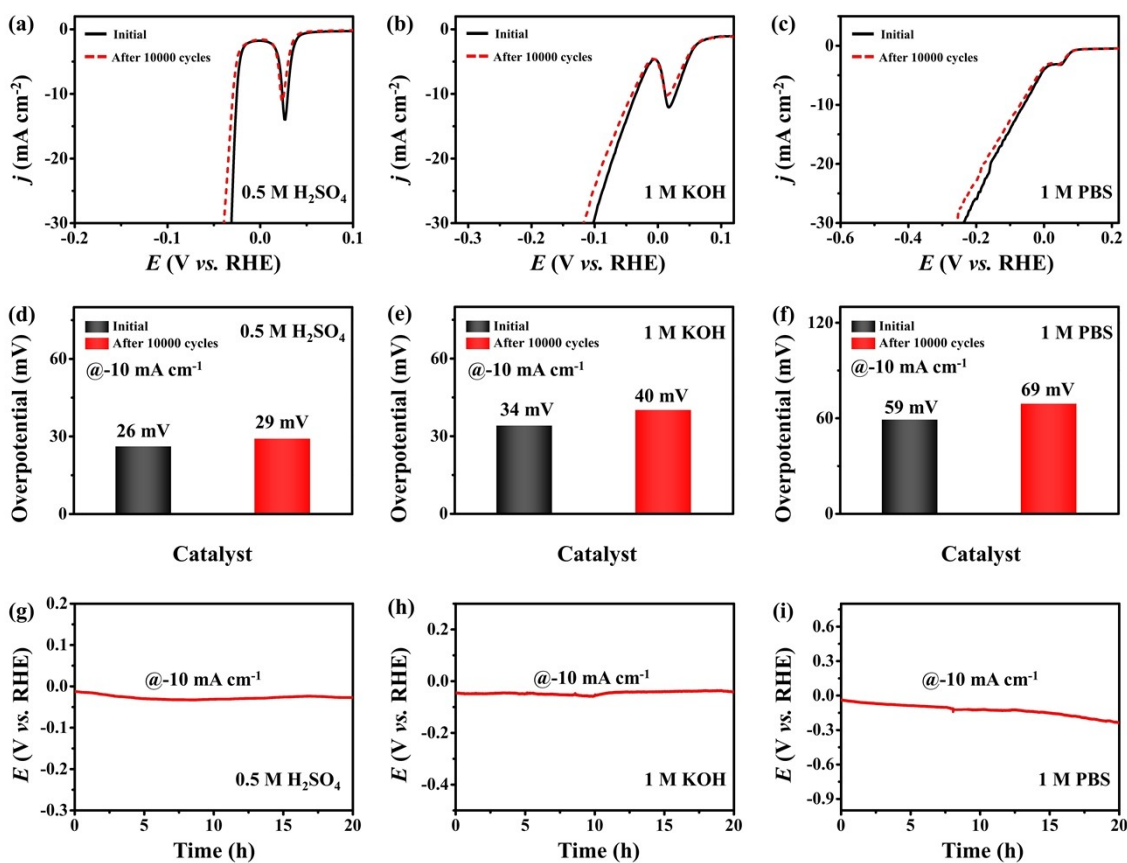

**Fig. S9** (a, b, and c) HER polarization curves of the N-PdIr bimetallic before and after 10000 cycles in acidic, alkaline, and neutral electrolytes, respectively. (d, e, and f) Comparison of the required overpotentials of the N-PdIr bimetallic before and after 10000 cycles at current density of  $-10$  mA cm<sup>-2</sup> in acidic, alkaline, and neutral electrolytes, respectively. (g, h, and i) Chronopotentiometry curves of the N-PdIr bimetallic under the cathodic current density of  $10$  mA cm<sup>-2</sup> in acidic, alkaline, and neutral electrolytes, respectively.

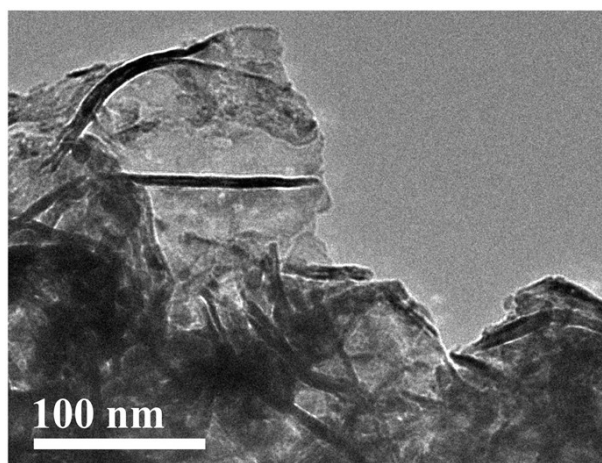

**Fig. S10** TEM image of the N-PdIr bimetallic after catalytic stability testing.

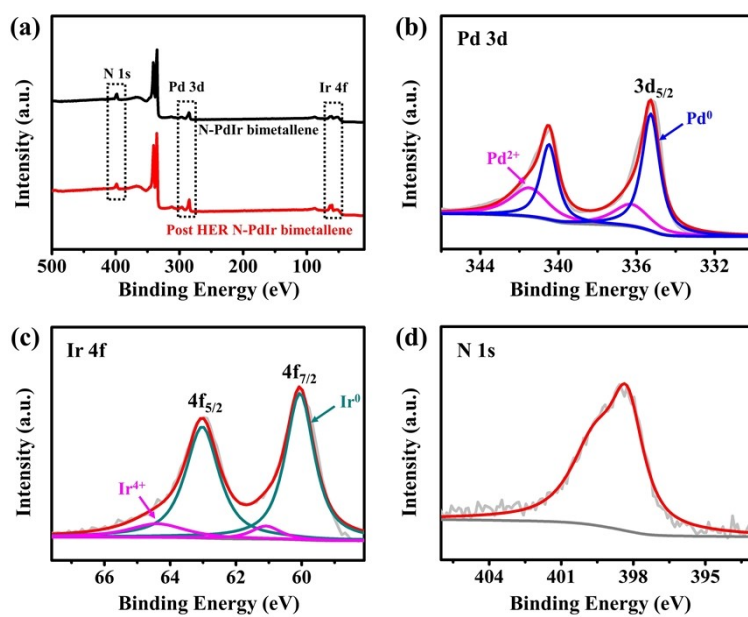

**Fig. S11** (a) XPS survey spectra of initial and post-HER N-PdIr bimetallic catalysts. (b) Pd 3d, (c) Ir 4f and (d) N 1s XPS spectra for post-HER N-PdIr bimetallic after stability testing.

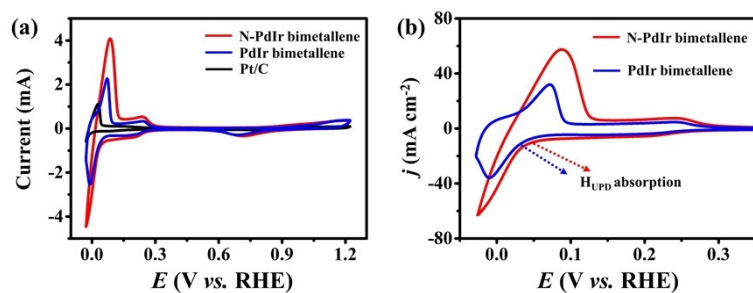

**Fig. S12** (a) CV curves for various catalysts recorded in 0.5 M H<sub>2</sub>SO<sub>4</sub> with a scan rate of 50 mV s<sup>-1</sup>.

(b) The regions between -0.05 and 0.35 V from (a).

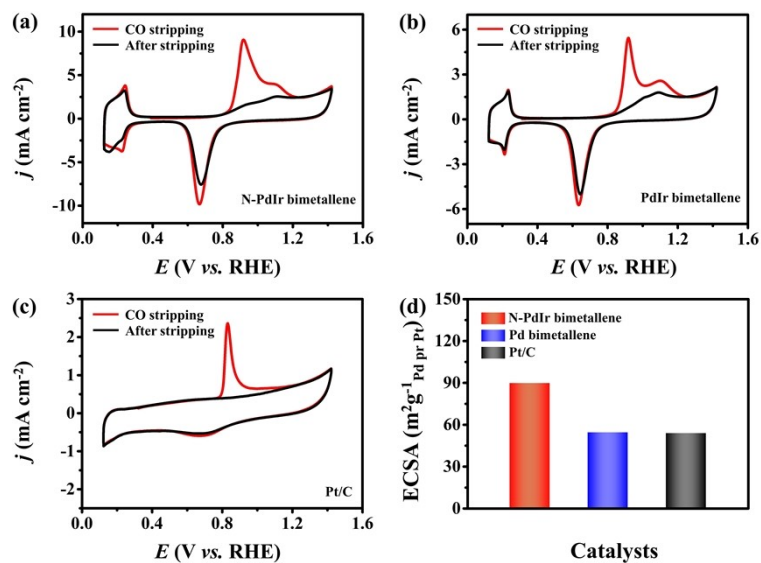

**Fig. S13** CO stripping measurements of (a) N-PdIr bimetallic, (b) PdIr bimetallic and (c) Pt/C in 0.5 M H<sub>2</sub>SO<sub>4</sub> at a scan rate of 20 mV s<sup>-1</sup>. (d) the corresponding ECSA.

**Table S1.** Comparison of HER activities in a 0.5 M H<sub>2</sub>SO<sub>4</sub> for N-PdIr bimetallic with other reported electrocatalysts.

| Catalysts                                               | Overpotential at 10 mA cm <sup>-2</sup> (mV) | Electrolyte                              | Ref.             |
|---------------------------------------------------------|----------------------------------------------|------------------------------------------|------------------|
| <b>N-PdIr bimetallic</b>                                | <b>26</b>                                    | <b>0.5 M H<sub>2</sub>SO<sub>4</sub></b> | <b>This work</b> |
| Pd-CN <sub>x</sub>                                      | 55                                           | 0.5 M H <sub>2</sub> SO <sub>4</sub>     | [1]              |
| Pd-CoS <sub>2</sub> -MoS <sub>2</sub> /C-600            | 144                                          | 0.5 M H <sub>2</sub> SO <sub>4</sub>     | [2]              |
| hollow RhCo nanoparticles                               | 28                                           | 0.5 M H <sub>2</sub> SO <sub>4</sub>     | [3]              |
| Rh <sub>3</sub> Pb <sub>2</sub> S <sub>2</sub> nanocage | 87                                           | 0.5 M H <sub>2</sub> SO <sub>4</sub>     | [4]              |
| PdCu@Pd NCs                                             | 68                                           | 0.5 M H <sub>2</sub> SO <sub>4</sub>     | [5]              |
| Rh/F-graphene-2 catalysts                               | 46                                           | 0.5 M H <sub>2</sub> SO <sub>4</sub>     | [6]              |
| Pd <sub>83.5</sub> Ir <sub>16.5</sub> nanocatalyst      | 73                                           | 0.5 M H <sub>2</sub> SO <sub>4</sub>     | [7]              |
| Ru <sub>2</sub> P nanoparticles                         | 55                                           | 0.5 M H <sub>2</sub> SO <sub>4</sub>     | [8]              |
| Mo <sub>2</sub> TiC <sub>2</sub> T <sub>x</sub> -PtSA   | 30                                           | 0.5 M H <sub>2</sub> SO <sub>4</sub>     | [9]              |
| Li-PPS ND catalyst                                      | 91                                           | 0.5 M H <sub>2</sub> SO <sub>4</sub>     | [10]             |



**Table S2.** Comparison of HER activities in a 1 M KOH for N-PdIr bimetallic with other reported electrocatalysts.

| Catalysts                              | Overpotential at 10 mA cm <sup>-2</sup> (mV) | Electrolyte    | Ref.             |
|----------------------------------------|----------------------------------------------|----------------|------------------|
| <b>N-PdIr bimetallic</b>               | <b>34</b>                                    | <b>1 M KOH</b> | <b>This work</b> |
| Ru <sub>2</sub> P nanoparticles        | 50                                           | 1 M KOH        | [8]              |
| PtNi/CNFs                              | 82                                           | 1 M KOH        | [11]             |
| Pd-Pt-S                                | 71                                           | 1 M KOH        | [12]             |
| Mn-Co-P/Ti                             | 76                                           | 1 M KOH        | [13]             |
| NiCo <sub>2</sub> S <sub>4</sub> /Pd   | 57                                           | 1 M KOH        | [14]             |
| Pt <sub>2</sub> Ni <sub>3</sub> -P NWs | 44                                           | 1 M KOH        | [15]             |
| Ni <sub>3</sub> N/Pt                   | 50                                           | 1 M KOH        | [16]             |
| PtPd@NLS                               | 46                                           | 1 M KOH        | [17]             |
| Rh NSs                                 | 43                                           | 1 M KOH        | [18]             |
| PtNi-O nanostructure                   | 40                                           | 1 M KOH        | [19]             |

**Table S3.** Comparison of HER activities in a 1 M PBS for N-PdIr bimetallic with other reported electrocatalysts.

| <b>Catalysts</b>      | <b>Overpotential at<br/>10 mA cm<sup>-2</sup> (mV)</b> | <b>Electrolyte</b> | <b>Ref.</b>      |
|-----------------------|--------------------------------------------------------|--------------------|------------------|
| N-PdIr bimetallic     | <b>59</b>                                              | <b>1 M PBS</b>     | <b>This work</b> |
| RhCoB aerogel         | 113                                                    | 1 M PBS            | [20]             |
| OsP <sub>2</sub> @NPC | 54                                                     | 1 M PBS            | [21]             |
| PdP <sub>2</sub> /CB  | 85                                                     | 1 M PBS            | [22]             |
| Pt@NOMC-A             | 65                                                     | 1 M PBS            | [23]             |
| Ru@Co-SAs/N-C         | 55                                                     | 1 M PBS            | [24]             |
| Pd-TiO <sub>2</sub>   | 155                                                    | 1 M PBS            | [25]             |

## References

1. T. Bhowmik, M. K. Kundu and S. Barman, *ACS Catal.*, 2016, **6**, 1929-1941.
2. Z. X. Cai, J. Na, J. Lin, A. A. Alshehri, K. A. Alzahrani, Y. G. Alghamdi, H. Lim, J. Zheng, W. Xia, Z. L. Wang and Y. Yamauchi, *Chem. Eur. J.*, 2020, **26**, 6195-6204.
3. J. Du, X. L. Wang, C. Li, X. Y. Liu, L. Gu and H. P. Liang, *Electrochim. Acta*, 2018, **282**, 853-859.
4. T. Kim, J. Park, H. Jin, A. Oh, H. Baik, S. H. Joo and K. Lee, *Nanoscale*, 2018, **10**, 9845-9850.
5. J. Li, F. Li, S. X. Guo, J. Zhang and J. Ma, *ACS Appl. Mater. Interfaces*, 2017, **9**, 8151-8160.
6. W. Shen, L. Ge, Y. Sun, F. Liao, L. Xu, Q. Dang, Z. Kang and M. Shao, *ACS Appl. Mater. Interfaces*, 2018, **10**, 33153-33161.
7. C. Wang, H. Xu, H. Shang, L. Jin, C. Chen, Y. Wang, M. Yuan and Y. Du, *Inorg. Chem.*, 2020, **59**, 3321-3329.
8. Y. Wang, Z. Liu, H. Liu, N. T. Suen, X. Yu and L. Feng, *ChemSusChem*, 2018, **11**, 2724-2729.
9. J. Q. Zhang, Y. F. Zhao, X. Guo, C. Chen, C. L. Dong, R. S. Liu, C. P. Han, Y. D. Li, Y. Gogotsi and G. X. Wang, *Nat. Catal.*, 2018, **1**, 985-992.
10. X. Zhang, Z. M. Luo, P. Yu, Y. Q. Cai, Y. H. Du, D. X. Wu, S. Gao, C. L. Tan, Z. Li, M. Q. Ren, T. Osipowicz, S. M. Chen, Z. Jiang, J. Li, Y. Huang, J. Yang, Y. Chen, C. Y. Ang, Y. L. Zhao, P. Wang, L. Song, X. J. Wu, Z. Liu, A. Borgna and H. Zhang, *Nat. Catal.*, 2018, **1**, 460-468.
11. J. W. Chen, J. Wang, J. D. Chen and L. N. Wang, *J. Mater. Sci.*, 2017, **52**, 13064-13077.
12. J. Fan, K. Qi, L. Zhang, H. Zhang, S. Yu and X. Cui, *ACS Appl. Mater. Interfaces*, 2017, **9**, 18008-18014.
13. T. Liu, X. Ma, D. Liu, S. Hao, G. Du, Y. Ma, A. M. Asiri, X. Sun and L. Chen, *ACS Catal.*, 2016, **7**, 98-102.
14. G. Sheng, J. Chen, Y. Li, H. Ye, Z. Hu, X. Z. Fu, R. Sun, W. Huang and C. P. Wong, *ACS Appl. Mater. Interfaces*, 2018, **10**, 22248-22256.
15. P. Wang, Q. Shao, J. Guo, L. Bu and X. Huang, *Chemistry of Materials*, 2020, **32**, 3144-3149.
16. Y. H. Wang, L. Chen, X. M. Yu, Y. G. Wang and G. F. Zheng, *Adv. Energy Mater.*, 2017, **7**, 1601390.
17. F. F. Wen, Y. Zhang, J. Tan, Z. F. Zhou, M. Zhu, S. X. Yin and H. G. Wang, *J. Electroanal. Chem.*, 2018, **822**, 10-16.
18. N. Zhang, Q. Shao, Y. C. Pi, J. Guo and X. Q. Huang, *Chem. Mater.*, 2017, **29**, 5009-5015.
19. Z. Zhao, H. Liu, W. Gao, W. Xue, Z. Liu, J. Huang, X. Pan and Y. Huang, *J. Am. Chem. Soc.*, 2018, **140**, 9046-9050.
20. K. Deng, T. Ren, Y. Xu, S. Liu, Z. Dai, Z. Wang, X. Li, L. Wang and H. Wang, *J. Mater. Chem. A*, 2020, **8**, 5595-5600.
21. L. Fang, Y. W. Wang, X. H. Yang, H. J. Zhang and Y. Wang, *J. Catal.*, 2019, **370**, 404-411.

22. F. Luo, Q. Zhang, X. Yu, S. Xiao, Y. Ling, H. Hu, L. Guo, Z. Yang, L. Huang, W. Cai and H. Cheng, *Angew. Chem. Int. Ed.*, 2018, **57**, 14862-14867.
23. Y. Yin, T. Liu, D. Liu, Z. Wang, Q. Deng, D. Qu, Z. Xie, H. Tang and J. Li, *J. Colloid Interface Sci.*, 2018, **530**, 595-602.
24. S. Yuan, Z. H. Pu, H. Zhou, J. Yu, I. S. Amiin, J. W. Zhu, Q. R. Liang, J. L. Yang, D. P. He, Z. Y. Hu, G. Van Tendeloo and S. C. Mu, *Nano Energy*, 2019, **59**, 472-480.
25. X. Zeng, Y. Bai, S. M. Choi, L. Tong, R. M. Aleisa, Z. Li, X. Liu, R. Yu, N. V. Myung and Y. Yin, *Mater. Today Nano*, 2019, **6**, 100038.
